# Supplementary material for: County‐Level Trends in Hypertension‐Related Cardiovascular Disease Mortality—United States, 2000 to 2019
Source: PubMed Central journal article supplement — J Am Heart Assoc. 2022 Mar 18;11(7):e024785. doi: 10.1161/JAHA.121.024785 (PMC9075476; doi:10.1161/jaha.121.024785), 2022-03-18
Supplement: JAH3-11-e024785-s001.pdf [file JAH3-11-e024785-s001.pdf]

# **SUPPLEMENTAL MATERIAL**

**Figure S1. Hypertension-related CVD death rates, 2019, and trends, 2010-2019, by sex, ages 34-64 years — United States.**

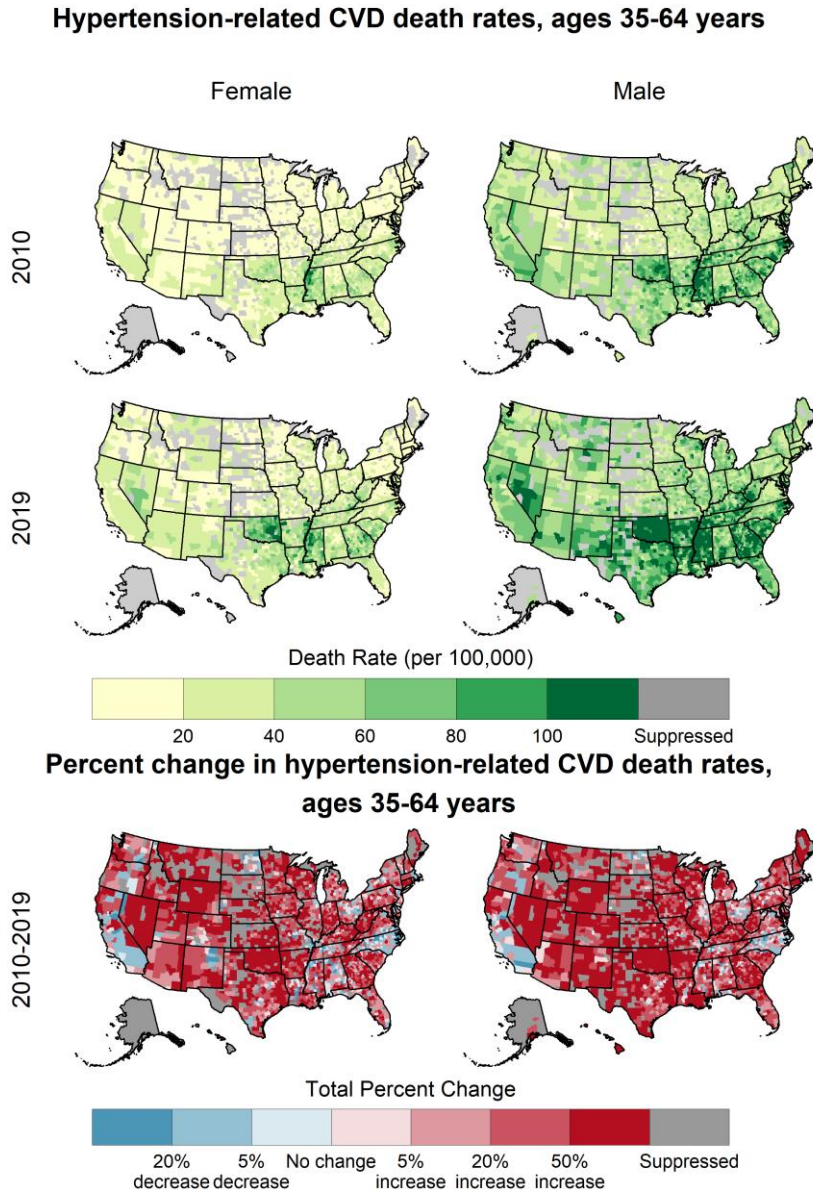

CVD: Cardiovascular disease

**Figure S2. Hypertension-related CVD death rates, 2019, and trends, 2010-2019, by race/ethnicity, ages 34-64 years — United States.**

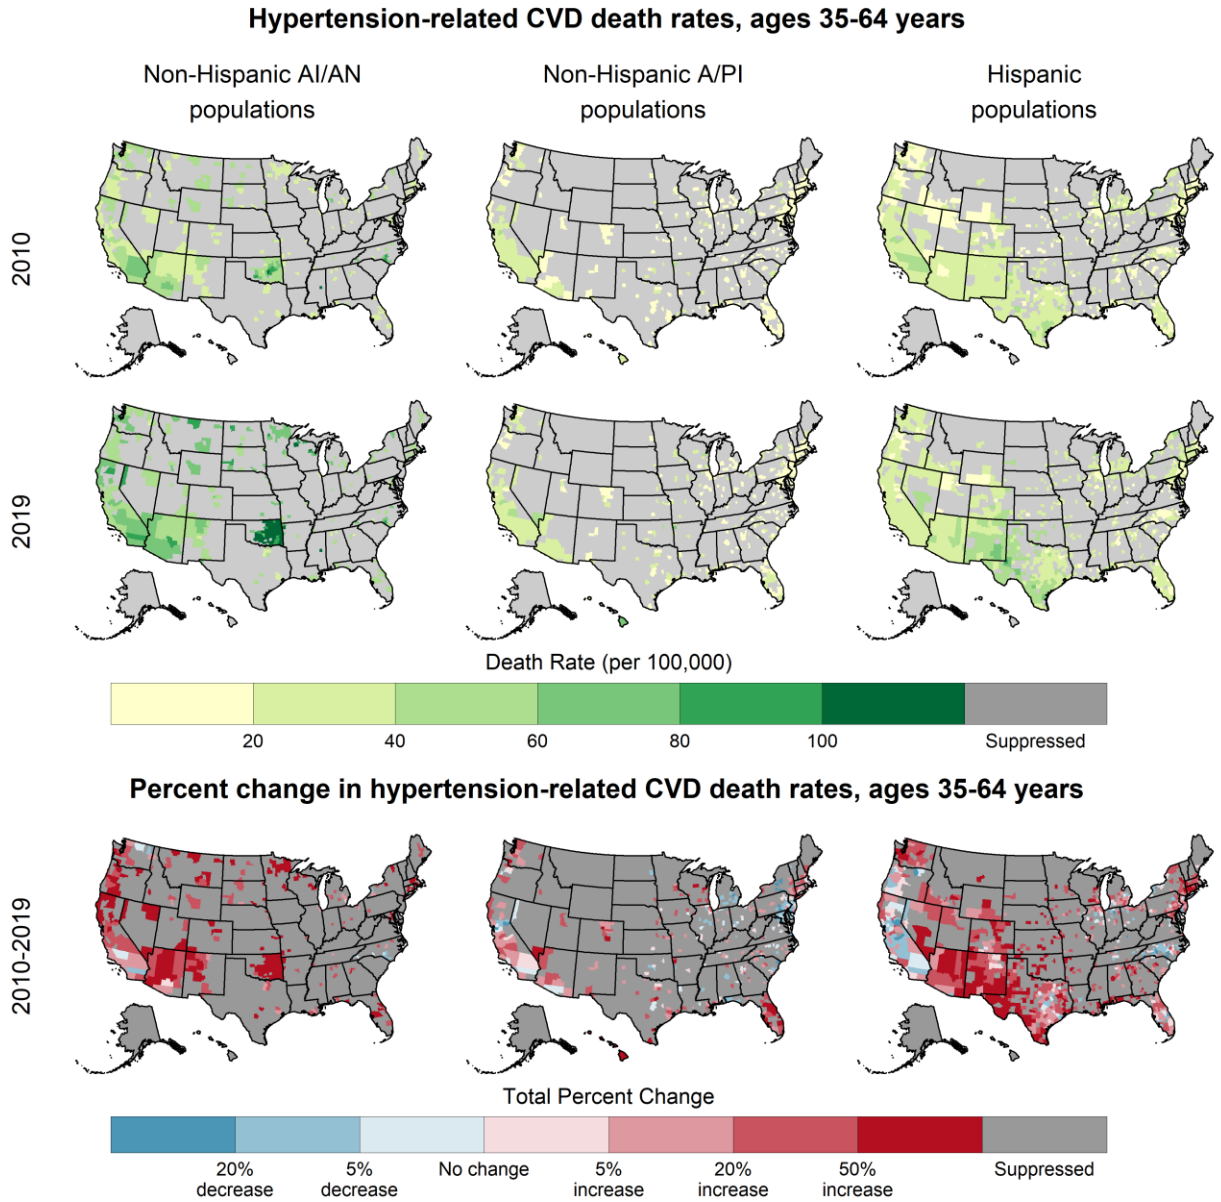

A/PI: Asian/Pacific Islander  
 AI/AN: American Indian/Alaska Native  
 CVD: Cardiovascular disease

**Figure S3. Hypertension-related CVD death rates, 2019, and trends, 2010-2019, by sex, ages ≥65 years — United States.**

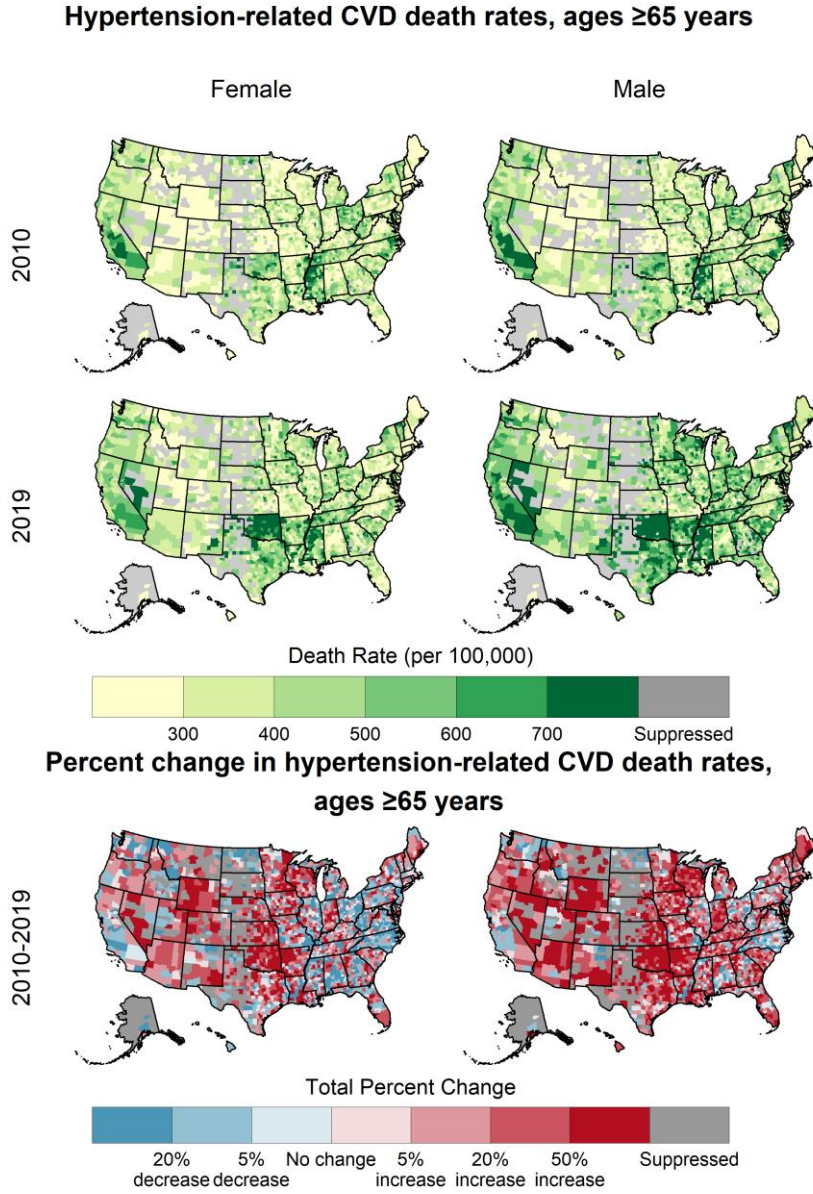

CVD: Cardiovascular disease

**Figure S4. Hypertension-related CVD death rates, 2019, and trends, 2010-2019, by race/ethnicity, ages ≥65 years — United States.**

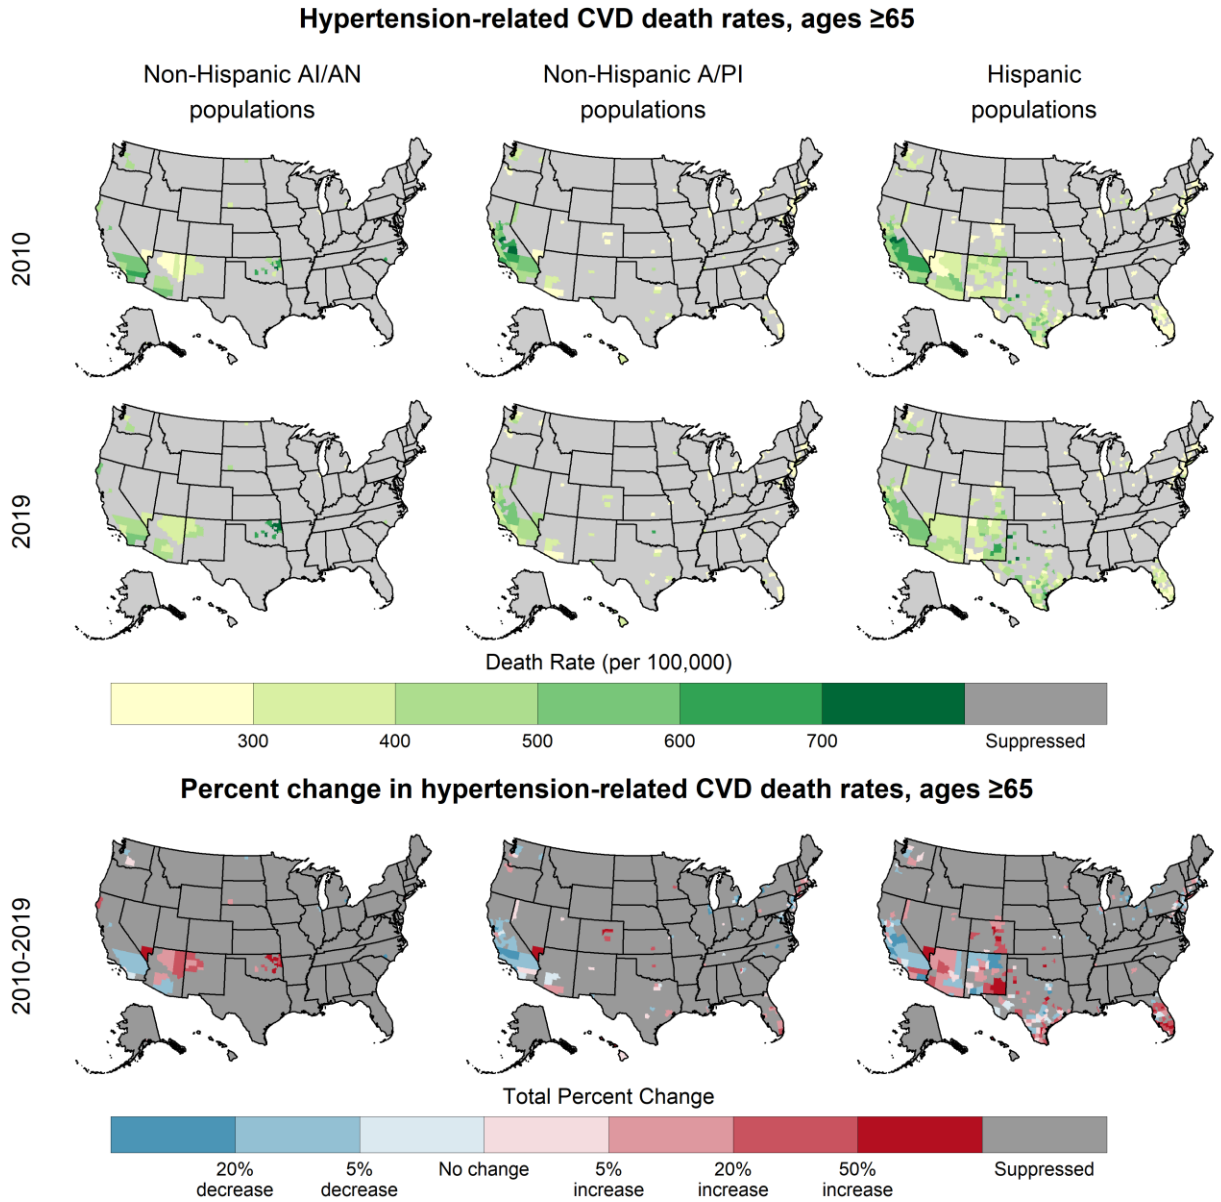

A/PI: Asian/Pacific Islander  
 AI/AN: American Indian/Alaska Native  
 CVD: Cardiovascular disease

Figure S5. CVD death rates with and without hypertension also listed on the death certificate, 2000-2019, by age group — United States.

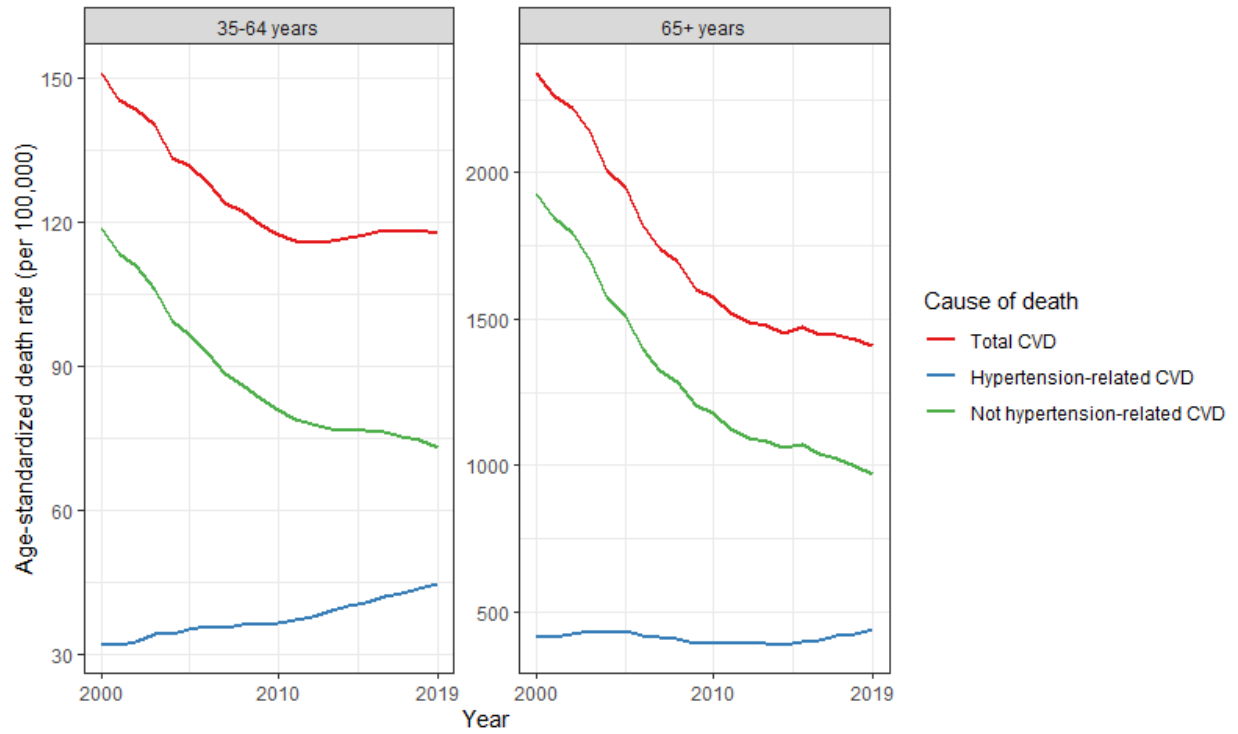

CVD: Cardiovascular disease

Figure S6. Percent of CVD deaths with hypertension also listed on the death certificate, 2000-2019, by age group — United States.

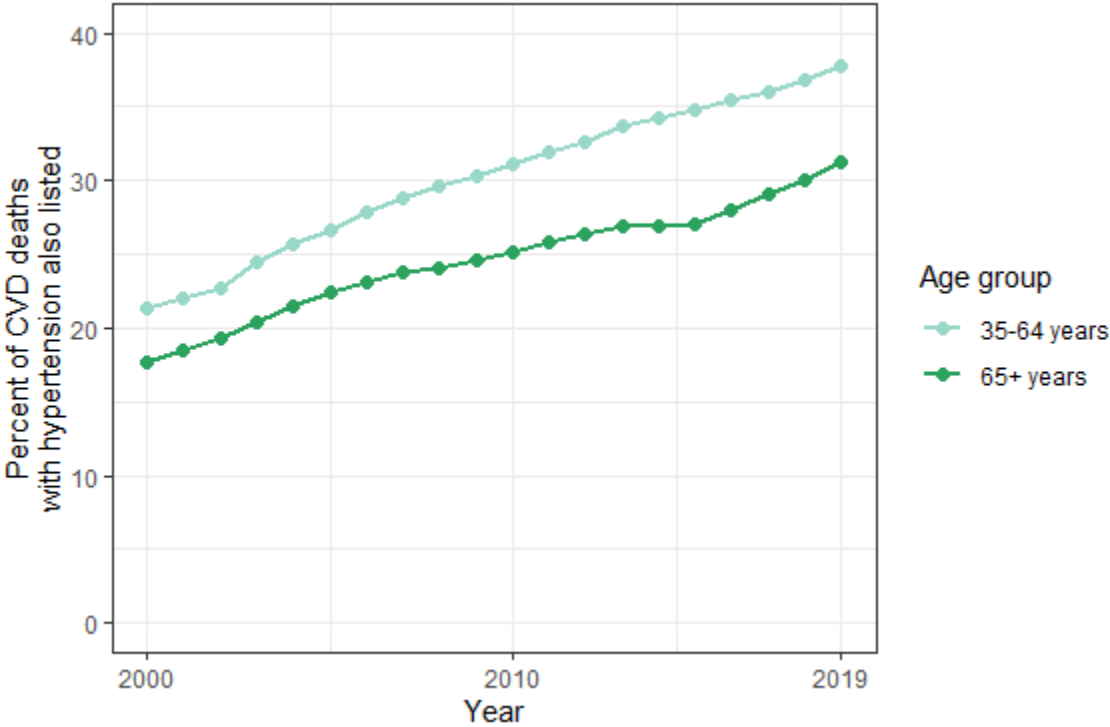

CVD: Cardiovascular disease
